# Supplementary material for: Nanog interaction with the androgen receptor signaling axis induce ovarian cancer stem cell regulation: studies based on the CRISPR/Cas9 system
Source: PubMed Central journal article supplement (PMC5930492; doi:10.1186/s13048-018-0403-2), 2018-05-02
Supplement: 13048_2018_403_MOESM1_ESM.pdf [file 13048_2018_403_MOESM1_ESM.pdf]

# Supplementary methods and materials

## Figure S1

Research model map

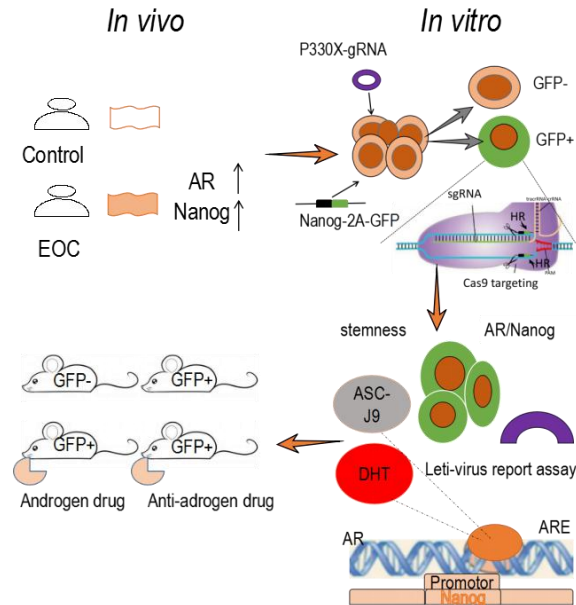

## Figure S2

Flow-chart for gene manipulation protocol

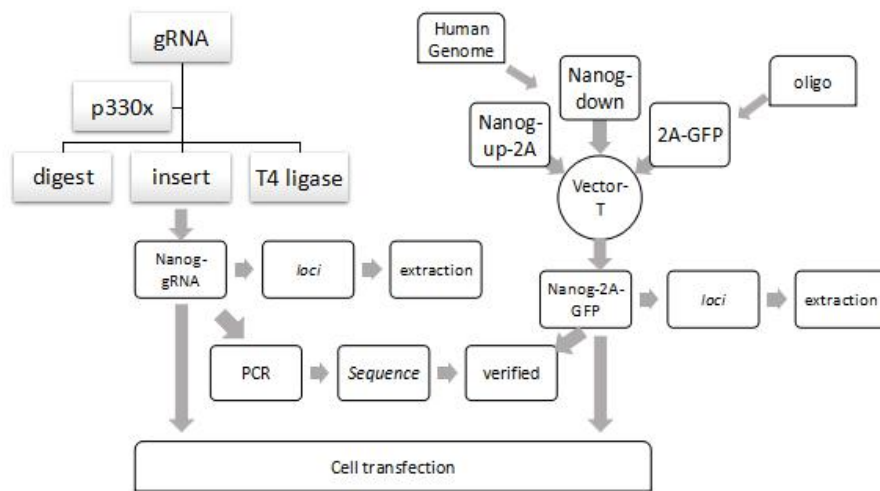

### Flow-Chat

### Constructed CRISPR/ Cas9-gRNA plasmid

First, we designed a single guide RNA (gRNA) targeted to the Nanog termination codon (<http://crispr.mit.edu/>) as follows: Nanog-gRNA-F1, CACCGTCTTCAGGTTGCATGTTCA and Nanog-gRNA-R1, AACTGAACATGCAACTGAAGAC. The primers were synthesized by Jingsirui. We

obtained the gRNA with the following PCR reaction parameters: 4  $\mu$ l of each primer (100 nM) for Nanog-gRNA (F+R) was placed into the mixture with 4  $\mu$ l of buffer + 12  $\mu$ l of ddH<sub>2</sub>O. The primer annealing procedure was 95°C for 2 min, followed by 95°C  $\rightarrow$  25°C (down 0.1°C every 8 seconds for 700 cycles), with a 12°C hold thereafter. Second, the P330X plasmid with Cas9 expression packaged in the loci was transformed into *Escherichia coli*, expanded and extracted. Next, we prepared the P330X plasmid enzyme as follows: 5  $\mu$ l of 10x buffer + 3  $\mu$ l of PX330 (1  $\mu$ g/ $\mu$ l) + 1  $\mu$ l of BbsI endonuclease + 11  $\mu$ l of ddH<sub>2</sub>O. We then performed gRNA conjugation as follows: 3  $\mu$ l of PX330 (1  $\mu$ g/ $\mu$ l) + 1  $\mu$ l of gRNA + 1  $\mu$ l of T4 DNA ligase + 1  $\mu$ l of T4 ligase buffer + 4  $\mu$ l of ddH<sub>2</sub>O at 16°C for 3 hours. Loci transformation was subsequently performed. The products were verified by PCR and Sanger sequencing (Supplementary Fig. 1). The PCR reaction (25  $\mu$ l) comprised the following: 2.5  $\mu$ l of 10 $\times$  LA Taq buffer + 4  $\mu$ l of dNTP + 0.25  $\mu$ l of LA Taq + 2  $\mu$ l of Primer Mix + 1  $\mu$ l of PX330-Nanog-gRNA (988 ng/ $\mu$ l) + 15.75  $\mu$ l of ddH<sub>2</sub>O. The PCR procedure was as follows: 94°C for 3 min, followed by 35 cycles of 94°C for 30 s  $\rightarrow$  60°C for 30 s  $\rightarrow$  72°C for 30 s, with a 12°C hold thereafter.

### **Construction of the 2A-GFP homologous recombination arm plasmid**

Genome extraction was performed with human blood, and the upstream and downstream 2Kb sequences of the Nanog gene termination codon were amplified by PCR (Table S1). Nanog-T-vector, Nanog-2A-up, Nanog-down and 2A-GFP sequences were amplified separately. The reaction was performed as follows: 2  $\mu$ l of 10x buffer + 1  $\mu$ l of DPNI enzyme + 15  $\mu$ l of PCR products + 2  $\mu$ l of ddH<sub>2</sub>O in a 37°C water bath for 5 hours.

Nanog-2A-up, Nanog-down and 2A-GFP were ligated. There was a 20-bp overlap. The Nanog-T-vector amplification had a 30-bp sequence overlap between the upstream and downstream regions. Finally, we used the Gibson cloning method for large DNA fragment ligations. The Gibson cloning method was performed in a total volume of 20  $\mu$ l as follows: 0.5  $\mu$ l of Nanog-2A + 1  $\mu$ l of 2A-GFP + 1.5  $\mu$ l of Nanog-down + 2  $\mu$ l of Nanog-T-vector + 15  $\mu$ l of the master mix at 50°C for 1 hour. The loci transformations of the Gibson products, PCR identification and Sanger sequencing were performed (Supplementary Figs. 3-5).

### **Figure S3**

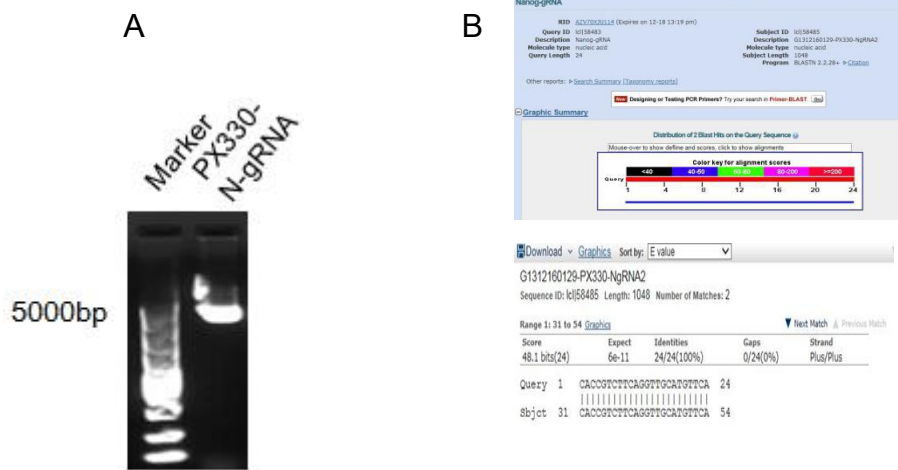

PX330-Nanog-gRNA electrophoresis and Sanger sequence documents

- A. PX330-Nanog-gRNA ;  
B. B.PX330-Nanog-gRNA Sanger sequencing documentary proof

**Figure S4**

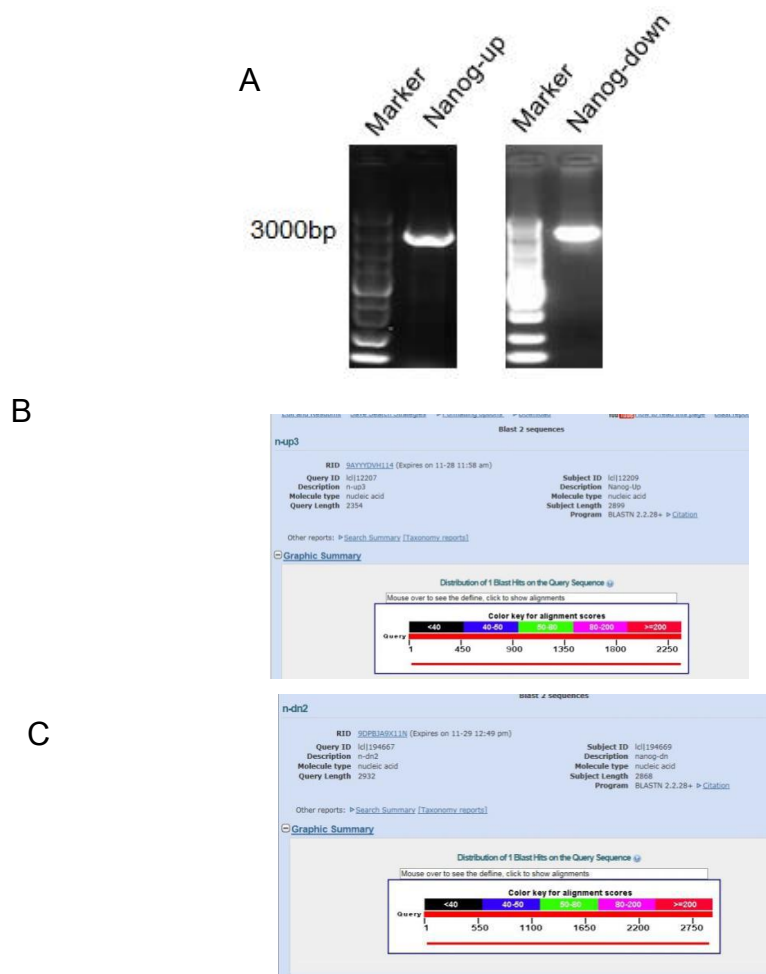

Nanog 2kb recombination arm PCR product and Sanger sequence documents

- A. Nanog-up and Nanog-down 2kb PCR electrophoresis;

- B. Nanog-up recombination arm 3 (N-up3) Sanger sequencing documentary proof;  
 C. Nanog-down recombination arm 2 (N-dn2) Sanger sequencing documentary proof.

**Figure S5**

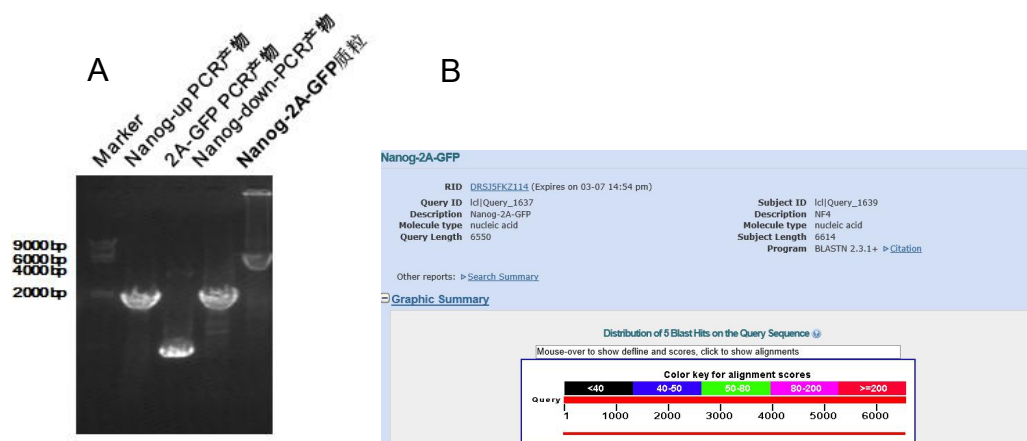

Nanog-2A-GFP recombination arm PCR product and Sanger sequence document

- A. Nanog-2A-GFP PCR product electrophoresis, Nanog-up: Nanog-up recombination arm, Nanog-down: Nanog-down recombination arm, 2A-GFP: 2A-GFP PCR product.  
 B. Nanog-2A-GFP documentary proof.

### Endonuclease enzyme digestion and T7E1 assay

Because Nanog-2A-GFP has no promoter, the transcriptional activity of the GFP can only be accessed while restructuring the Nanog coding rear area. Next, to verify Nanog-2A-GFP by PCR, we designed the upstream primer and downstream primer binding sites on the GFP-Nanog joint sequence. With extra HindIII enzyme *loci* sites on the GFP sequences, the correct target cell PCR amplification products comprised three HindIII enzyme bands after digestion with the restriction HindIII enzyme.

### Primers listed below

Table S1 The PCR primers for the 2A-GFP homologous recombination arm

| Name              | Sequence                                               | Sequence – (5'-3')                              |
|-------------------|--------------------------------------------------------|-------------------------------------------------|
| Nanog-up primer   | Nanog-up-F:<br>TGAGGTGCTGGTTTTATAGAATCCCCA             | Nanog-up-R:<br>CACGTCTTCAGGTTGCATGTTTCATGG      |
| Nanog-down primer | Nanog-down-F<br>AGATGAGTGAAACTGATATTACTCAAT<br>TTCAGTC | Nanog-down-R<br>AACATAATACAGGGCTAGGCTGGTGA<br>C |
| Verified primer   | Primer-up                                              | Primer-down                                     |

|  |                             |                                                  |
|--|-----------------------------|--------------------------------------------------|
|  | AGAGCCTGTCCCTTTGTTATGTGACTG | TGGACGAGCTGTACAAGTAAAGATGA<br>GTGAAA- CTGAT ATT) |
|--|-----------------------------|--------------------------------------------------|

**Table S2 Primer for RT-qPCR**

| Gene primer name | Sequence (5'-3')                 |
|------------------|----------------------------------|
| RT-Nanog primer  | Forward:<br>CTCTCCTCTCCTTCCTCCAT |
|                  | Reverse:<br>TTGCGACACTCTTCTCTGC  |
| RT-AR primer     | Forward:<br>TAGCCCCCTACGGCTACA   |
|                  | Reverse: TTCCGAAGACGACAAGATGGAC  |
| RT-GAPDH primer  | Forward: CACCCACTCCTCCACCTTTG    |
|                  | Reverse: CCACCACCTGTTGCTGTAG     |

**Figure S6**

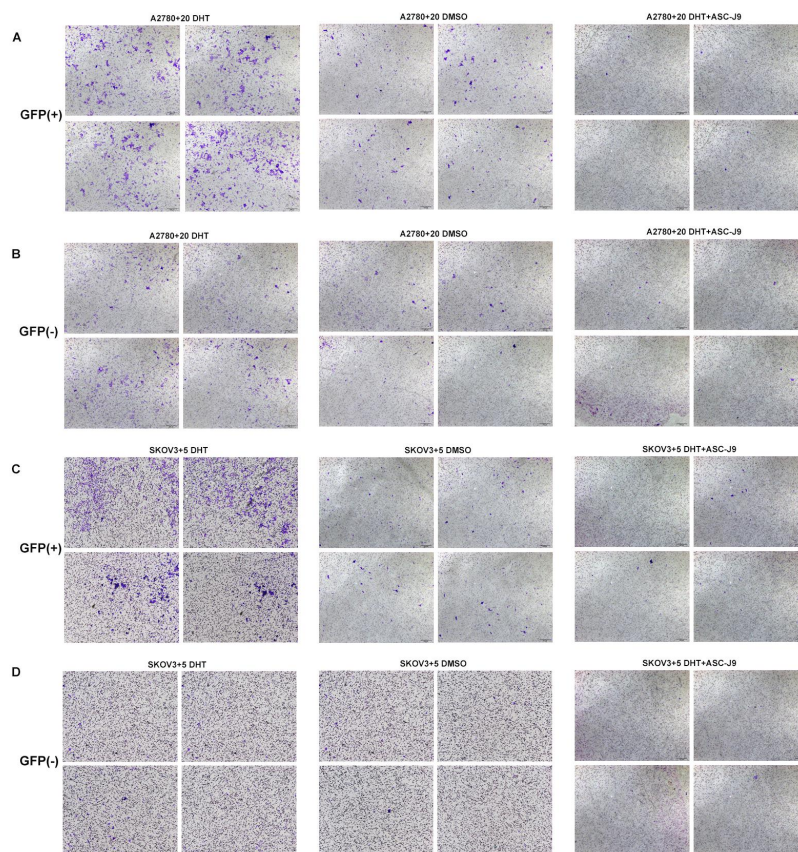

**Migratory tendency of GFP (+)/GFP (-) cells with hormone treatment**

The number of migratory cells increased in the DHT groups of the A2780+20 and SKOV3+5 GFP (+) cell lines (Fig A and C) when compared with GFP (-) cell lines (Fig B and D). Magnification: 40X;

Bar scale: 200  $\mu$ M.
